# Supplementary material for: Ultrathin-Layer Structure of BiOI Microspheres Decorated on N-Doped Biochar With Efficient Photocatalytic Activity
Source: Front Chem. 2019 May 24;7:378. doi: 10.3389/fchem.2019.00378 (PMC6544087; doi:10.3389/fchem.2019.00378)
Supplement: Supplementary file 1 [file Table_1.XLSX]

## Sheet: Sheet1
Table S1. The elements and chemicals analysis of NCC, BiOI, BiOI-HCl, BiOI-AcOH, BiOI/NCC-HCl and BiOI/NCC- AcOH
Atomic percentage	Bi	O	I	C	N
NCC	/	6.3	/	81.9	11.8
BiOI	15.1	20.19	11.25	53.46	/
BiOI-HCl	16.91	25.46	10.63	47	/
BiOI-AcOH	16.96	23.15	12.9	46.99	/
BiOI/NCC-HCl	15.32	22.32	9.92	47.14	5.3
BiOI/NCC-AcOH	13.38	20.09	10.33	56.2	/
Table S2. Specific surface area, porosity properties and distribution of pore volume of NCC, BiOI, BiOI-HCl, BiOI-AcOH, BiOI/NCC-HCl and BiOI/NCC- AcOH
Sample	SBET	Pore vol (cm3/g)
	(m2/g)	V S<2nm	V2nm<S<50nm	V S>50nm
NCC	454	0.17	0.04	0.012
BiOI	21.5	0.001	0.06	0.006
BiOI-HCl	24.7	0.002	0.085	0.029
BiOI-AcOH	28.5	0.002	0.083	0.039
BiOI/NCC-HCl	27.2	0.006	0.064	0.042
BiOI/NCC- AcOH	36.3	0.005	0.069	0.064
